# Supplementary material for: First-principles screening of dopants for high-conductivity graphene/copper interfaces
Source: Royal Society of Chemistry journal article supplement (doi:10.1039/d5ra09101b), 2026-01-01
Supplement: d5ra09101b1.pdf [file d5ra09101b1.pdf]

## First-Principles Screening of Dopants for High-Conductivity Graphene/Copper Interfaces- Supplementary Material

Xinsi Zhao,<sup>a</sup> Boan Zhong,<sup>a</sup> Baixue Bian,<sup>\*a</sup> Jiamiao Ni,<sup>a</sup> Mingyu Gong,<sup>\*ab</sup> Yue Liu,<sup>\*a</sup> Tongxiang Fan<sup>a</sup>

<sup>a</sup>State Key Lab of Metal Matrix Composites, School of Materials Science and Engineering, Shanghai Jiao Tong University, Shanghai 200240, China

<sup>b</sup>Institute of Medical Robotics, Shanghai Jiao Tong University, Shanghai 200240, China

Author to whom correspondence should be addressed: [baixuebian@sjtu.edu.cn](mailto:baixuebian@sjtu.edu.cn) (B.B.); [mingyugong@sjtu.edu.cn](mailto:mingyugong@sjtu.edu.cn) (M.G.)  
and [yliu23@sjtu.edu.cn](mailto:yliu23@sjtu.edu.cn) (L.L.);

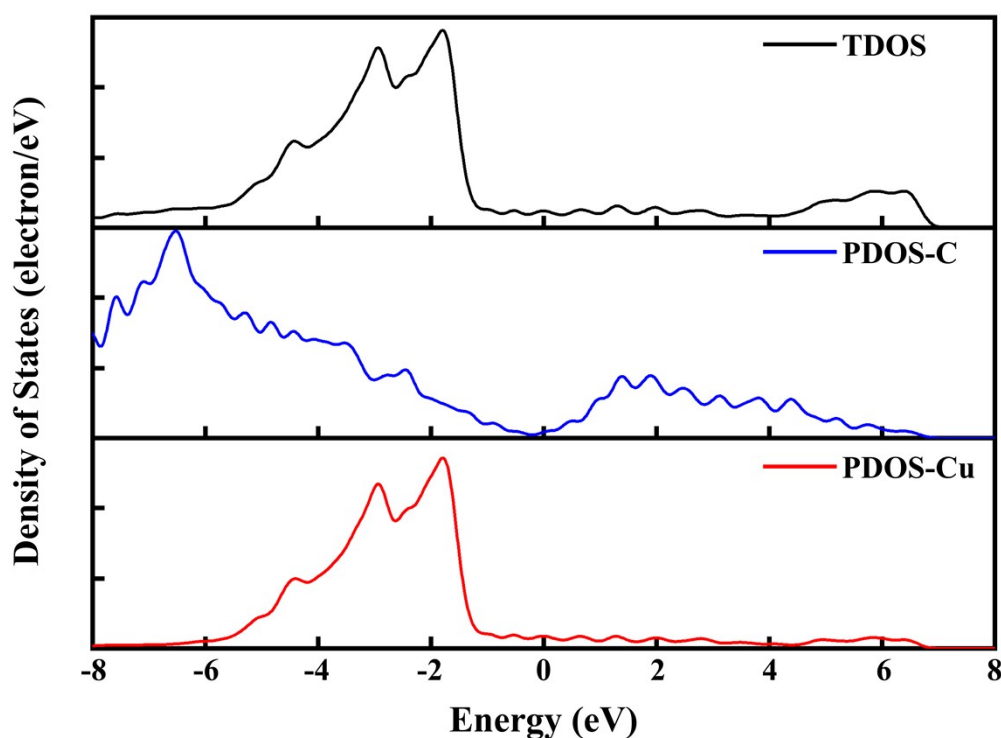

Fig. S1. The DOS of the Gr/Cu interface.

### derivation of equation

$$E_F = \hbar v_F \sqrt{\pi n} \quad (\text{eq.1})$$

For two-dimensional material like suspended Gr, it has a zero bandgap and linear dispersion relation

$$E(k) = \hbar v_F k \quad (\text{eq.2})$$

The electrons are all in a plane of radius  $k$  in k-space. The degeneracy of Gr is 4, which from spin degeneracy and valley degeneracy. Thus the number of states is

$$\begin{aligned} N(E) &= 4 \cdot \frac{S}{(2\pi)^2} \cdot \pi k^2 \\ &= \frac{2SE^2}{\pi \hbar^2 v_F^2} \end{aligned} \quad (\text{eq.3})$$

The number of states per unit energy interval is

$$D(E) = \frac{dN(E)}{dE} = \frac{d\left(\frac{SE^2}{2\pi \hbar^2 v_F^2}\right)}{dE} = \frac{2SE}{\pi \hbar^2 v_F^2} \quad (\text{eq.4})$$

The number of states per unit area is

$$g(E) = \frac{2E}{\pi \hbar^2 v_F^2} \quad (\text{eq.5})$$

The electron distribution near the Fermi level follows the Fermi-Dirac statistics

$$f(E) = \frac{1}{e^{\frac{E - E_F}{k_B T}} + 1} \quad (\text{eq.6})$$

Simplifying this equation, when there are electrons,  $f(E)=1$ ; when there are unoccupied,  $f(E)=0$ .

The carrier concentration can be calculated by

$$n = \int_0^{E_F} g(E) f(E) dE = \int_0^{E_F} \frac{2E}{\pi \hbar^2 v_F^2} dE = \frac{E_F^2}{\pi \hbar^2 v_F^2} \quad (\text{eq.7})$$

Which can be written as

$$E_F = \hbar v_F \sqrt{\pi n} \quad (\text{eq.1})$$

$$n = \frac{m^*}{\pi \hbar^2} \Delta E \quad (\text{eq.8})$$

When doping in Gr of Gr/Cu composite induced bandgap opening, the linearity may be disrupted. The same derivation is used to derive the equation for the carrier concentration under the parabolic band.

The relationship between energy ( $E(k)$ ) and wave vector ( $k$ ) is

$$E(k) = \frac{\hbar^2 k^2}{2m^*} \quad (\text{eq.9})$$

The number of states is

$$\begin{aligned} N(E) &= 2 \cdot \frac{S}{(2\pi)^2} \cdot \pi k^2 \\ &= 2 \cdot \frac{S}{(2\pi)^2} \cdot \pi \cdot \frac{2m^* E}{\hbar^2} \\ &= \frac{Sm^* E}{\pi \hbar^2} \end{aligned} \quad (\text{eq.10})$$

The number of states per unit energy interval is

$$D(E) = \frac{dN(E)}{dE} = \frac{d\left(\frac{Sm^* E}{\pi \hbar^2}\right)}{dE} = \frac{Sm^*}{\pi \hbar^2} \quad (\text{eq.11})$$

The number of states per unit area is

$$g(E) = \frac{m^*}{\pi \hbar^2} \quad (\text{eq.12})$$

The carrier concentration can be calculated by

$$n = \int_0^{E_F} g(E) f(E) dE = \int_0^{E_F} \frac{m^*}{\pi \hbar^2} dE = \frac{m^*}{\pi \hbar^2} E_F \quad (\text{eq.13})$$

Which can be written as

$$n = \frac{m^*}{\pi \hbar^2} \Delta E \quad (\text{eq.8})$$
